# Supplementary material for: Inhibition of KLF4 by Statins Reverses Adriamycin-Induced Metastasis and Cancer Stemness in Osteosarcoma Cells
Source: PubMed Central journal article supplement — Stem Cell Reports. 2017 May 25;8(6):1617–29. doi: 10.1016/j.stemcr.2017.04.025 (PMC5470096; doi:10.1016/j.stemcr.2017.04.025), 2017-05-25
Supplement: mmc1.pdf [file mmc1.pdf]

**Stem Cell Reports, Volume 8**

**Supplemental Information**

**Inhibition of KLF4 by Statins Reverses Adriamycin-Induced Metastasis  
and Cancer Stemness in Osteosarcoma Cells**

**Yangling Li, Miao Xian, Bo Yang, Meidan Ying, and Qiaojun He**

# Supplemental Figure S1

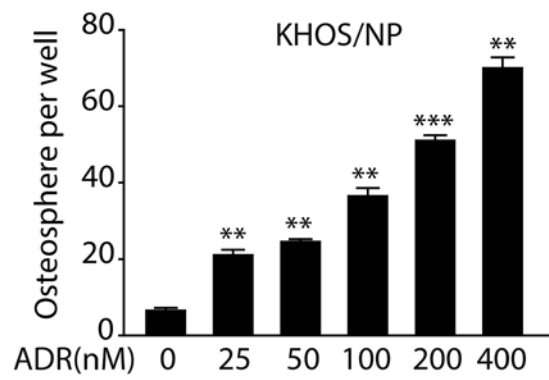

**Supplemental Figure S1. ADR treatment elevates the sphere formation ability of KHOS/NP cells.**

(Related to Figure 1) Cells treated with increasing concentrations of ADR were subjected to the sphere-forming assay. Data presented are the mean  $\pm$  SD of three independent experiments. \*\* P < 0.01, \*\*\* P < 0.001 *versus* vehicle.

# Supplemental Figure S2

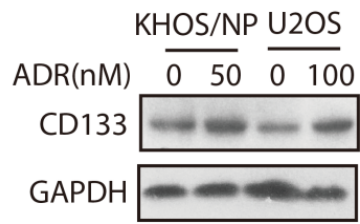

**Supplemental Figure S2. ADR treatment increases CD133 protein expression in osteosarcoma cells.** (Related to Figure 1) Cell lysates of KHOS/NP and U2OS cells treated with the indicated concentrations of ADR for 24 hr were analyzed by western blotting. Representative images from three independent experiments are shown.

## Supplemental Figure S3

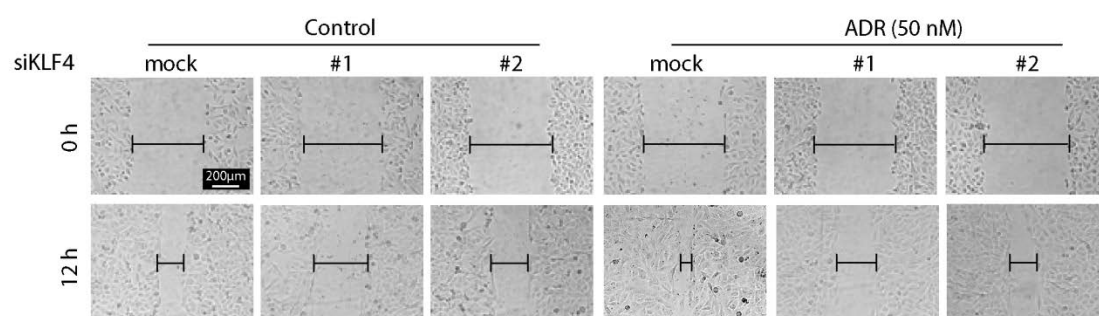

**Supplemental Figure S3. KLF4 depletion greatly abolishes wound-closure capability of KHOS/NP cells induced by ADR.** (Related to Figure 4) KHOS/NP cells were transfected with KLF4 siRNA or Mock (control siRNA) for 48 hr, followed by treatment with ADR (50 nM) for 24 hr, and cell motility was analyzed using the scratch assay. Representative images from three independent experiments are shown.

# Supplemental Figure S4

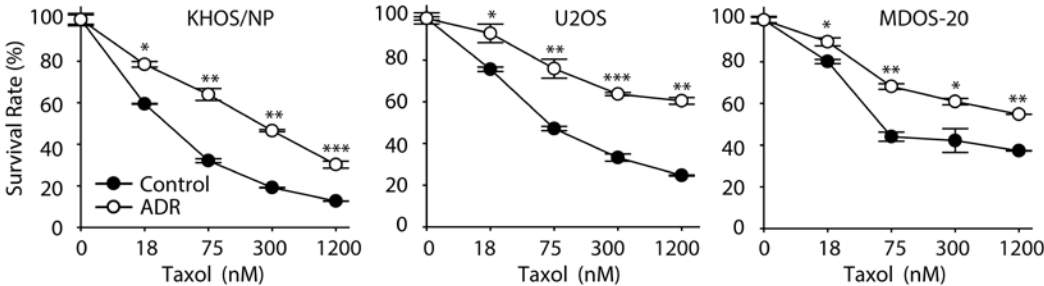



**Supplemental Figure S4. ADR treatment results in resistance to taxol.** (Related to Figure 1)  
Osteosarcoma cells were pretreated with vehicle or ADR for 24 hr and then exposed to different concentrations of taxol for 72 hr. Cell viability was determined by the SRB assay. Results represent mean $\pm$ SD, n=3. \* P  $\leq$  0.05; \*\* P  $\leq$  0.01; \*\*\* P  $\leq$  0.001, *versus* vehicle control group.

**Supplemental Table S2. Primers used for qRT-PCR amplification**

| <b>Gene symbol</b> | <b>5'-3'sequence</b>       | <b>5'-3'sequence</b>       |
|--------------------|----------------------------|----------------------------|
| <i>CD133</i>       | GCTTTGCAATCTCCCTGTTG       | TTGATCCGGGTCTTACCTG        |
| <i>ALDH1A1</i>     | CACCAGGGCCAGTGTGTAT        | AACACTGTGGGCTGGACAAA       |
| <i>ABCG2</i>       | CACCTTATTGGCCTCAGGAA       | CCTGCTTGGGAAGGCTCTATG      |
| <i>SOX2</i>        | TACAGCATGTCCTACTCGCAG      | GAGGAAGAGGTAACCACAGGG      |
| <i>KLF4</i>        | ACCAGGCACTACCGTAAACACA     | GGTCCGACCTGGAAAATGCT       |
| <i>OCT3/4</i>      | CTGGAGAAGGAGAAGCTGGA       | CAAATTGCTCGAGTTCTTTCTG     |
| <i>NANOG</i>       | AAAGAATCTTCACCTATGCC       | GAAGGAAGAGGAGAGACAGT       |
| <i>C-MYC</i>       | TCCGTCTCGGATTCTCTGCTCT     | GCCTCCAGCAGAAGGTGATCCA     |
| <i>BMI1</i>        | AAATGCTGGAGAACTGGAAAG      | CTGTGGATGAGGAGACTGC        |
| <i>RAC1</i>        | AGACGGAGCTGTAGGTAAAA       | GCAGGACTCACAAGGGA          |
| <i>CD24</i>        | CAATATTAATCTGCTGGAGTTTCATG | TCCATATTTCTCAAGCCACATTCA   |
| <i>ID2</i>         | CTGTCCTTGCAGGCTTCTGAATTC   | CATGAACACCGCTTATTCAGCCAC   |
| <i>DNER</i>        | CTCCATTTCTGCATGGGTCT       | GAGGAAACCTTGCCAAAACA       |
| <i>MMP2</i>        | TGATCTTGACCAGAATACCATCGA   | GGCTTGCGAGGGAAGAAGTT       |
| <i>S100P</i>       | GATGCCGTGGATAAATTGCT       | AGGGCATCATTTGAGTCCTG       |
| <i>SPP1</i>        | TCACAGCCATGAAGATATGCTGG    | TACAGGGAGTTTCCATGAAGCCAC   |
| <i>CXCR-4</i>      | GGTGGTCTATGTTGGCGTCT       | TGGAGTGTGACAGCTTGGAG       |
| <i>GAPDH</i>       | GTC ATC CAT GAC AAC TTT GG | GAG CTT GAC AAA GTG GTC GT |
